# Supplementary material for: MiR-146a encapsulated liposomes reduce vascular inflammatory responses through decrease of ICAM-1 expression, macrophage activation, and foam cell formation
Source: Royal Society of Chemistry journal article supplement (doi:10.1039/d2nr03280e), 2023-01-01
Supplement: d2nr03280e1.pdf [file d2nr03280e1.pdf]

## Supplementary Materials for

### **MiR-146a encapsulated liposomes reduce vascular inflammatory responses through decrease of ICAM-1 expression, macrophage activation, and foam cell formation**

Donald Ho,<sup>†1</sup> Tyler Lynd,<sup>†2</sup> Claire Jun,<sup>3</sup> Juhee Shin,<sup>4</sup> Reid Millican,<sup>5</sup> Benjamin K. Estep,<sup>2</sup> Jun Chen,<sup>2</sup> Xixi Zhang,<sup>2</sup> Brigitta Brott,<sup>6</sup> Dong-Woon Kim,<sup>4</sup> Jennifer Sherwood,<sup>#5</sup> and Patrick Hwang<sup>#5</sup>

<sup>1</sup> Department of Pediatric Dentistry, University of Alabama at Birmingham, AL, 35294, USA

<sup>2</sup> Department of Biomedical Engineering, University of Alabama at Birmingham, AL, 35294, USA

<sup>3</sup> School of Arts and Sciences, University of Pennsylvania, PA, 19104, USA

<sup>4</sup> Department of Anatomy and Cell Biology, Brain Research Institute, Chungnam National University College of Medicine, Daejeon, 35015, Republic of Korea

<sup>5</sup> Endomimetics, LLC, Birmingham, AL, 35242, USA E-mail: [patrick@endomimetics.com](mailto:patrick@endomimetics.com), [jasherwood@endomimetics.com](mailto:jasherwood@endomimetics.com).

<sup>6</sup> Department of Medicine and Division of Cardiovascular Disease, University of Alabama at Birmingham, AL, 35233, USA

# Correspondence: [patrick@endomimetics.com](mailto:patrick@endomimetics.com), [jasherwood@endomimetics.com](mailto:jasherwood@endomimetics.com)

#### **This file includes:**

Figure S1.1 Freeze-thaw effect on liposome without sucrose.

Figure S1.2 Long term analysis of liposome size distribution.

Figure S1.3 Size distribution analysis of miR-146a encapsulated liposomes following freeze thaw.

Figure S2. Analytic gating strategy of flow cytometry for miR-146a transfected cells.

Figure S3. Analysis of TRAF6 and IRAK1 production in LPS treated- and LPS and free miR-146a treated differentiated U937 cells.

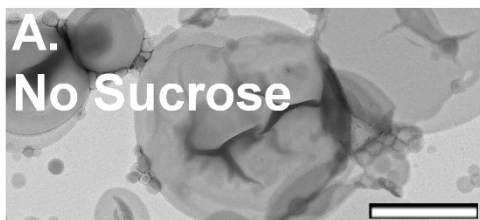

**Figure S1.1. Freeze-thaw effect on liposome without sucrose A.)** Representative TEM image of liposome frozen at -80 °C without sucrose after freeze thaw. Scale bar is 1  $\mu\text{m}$ .

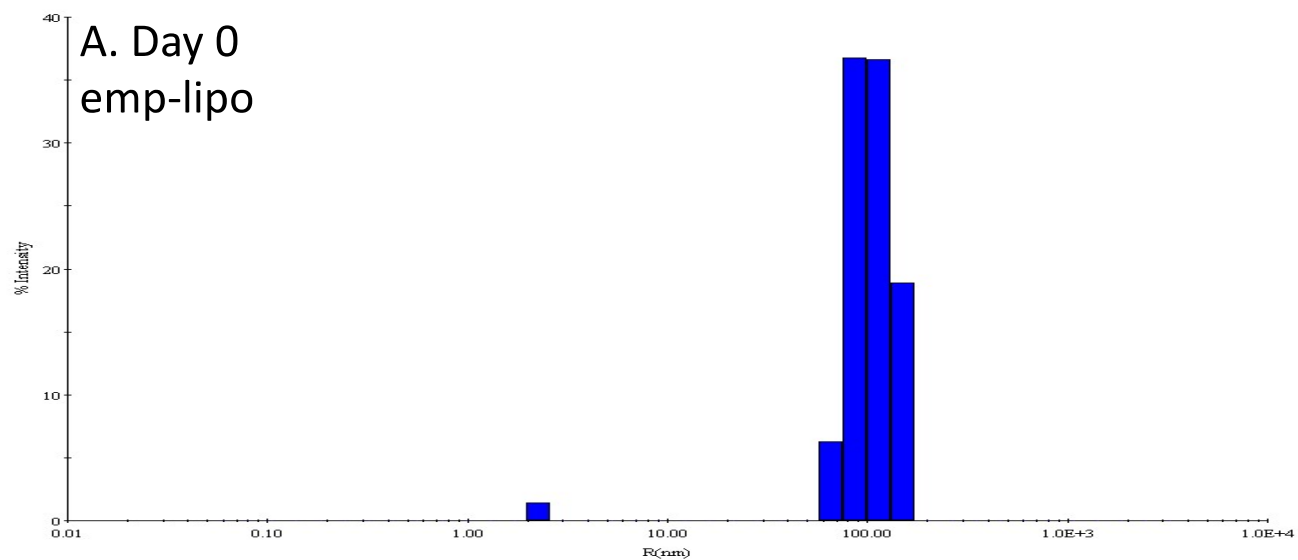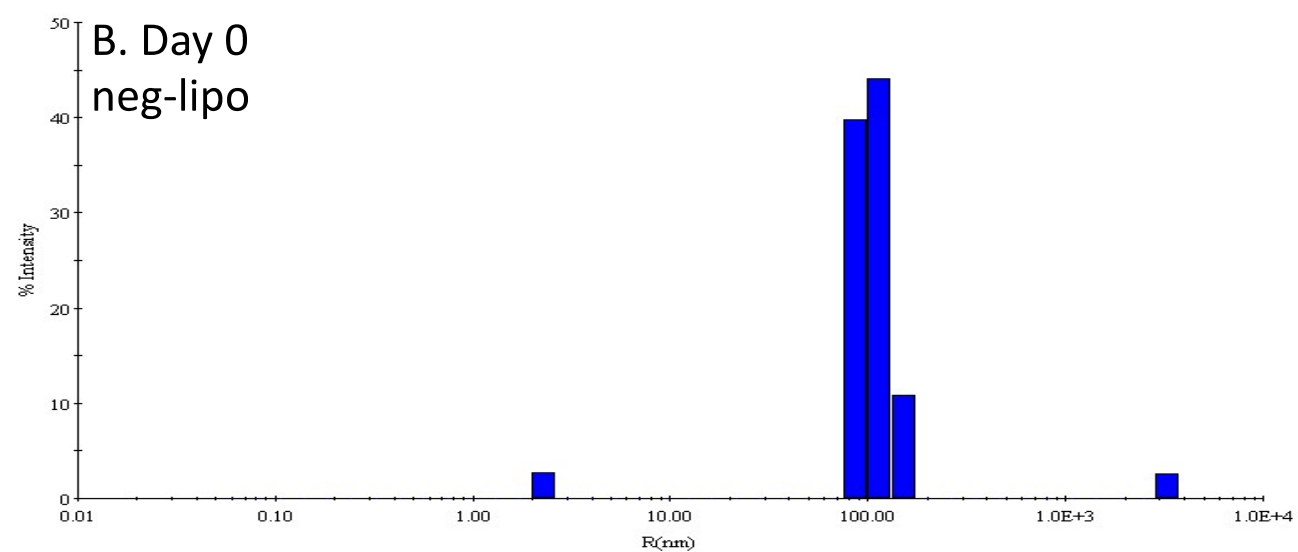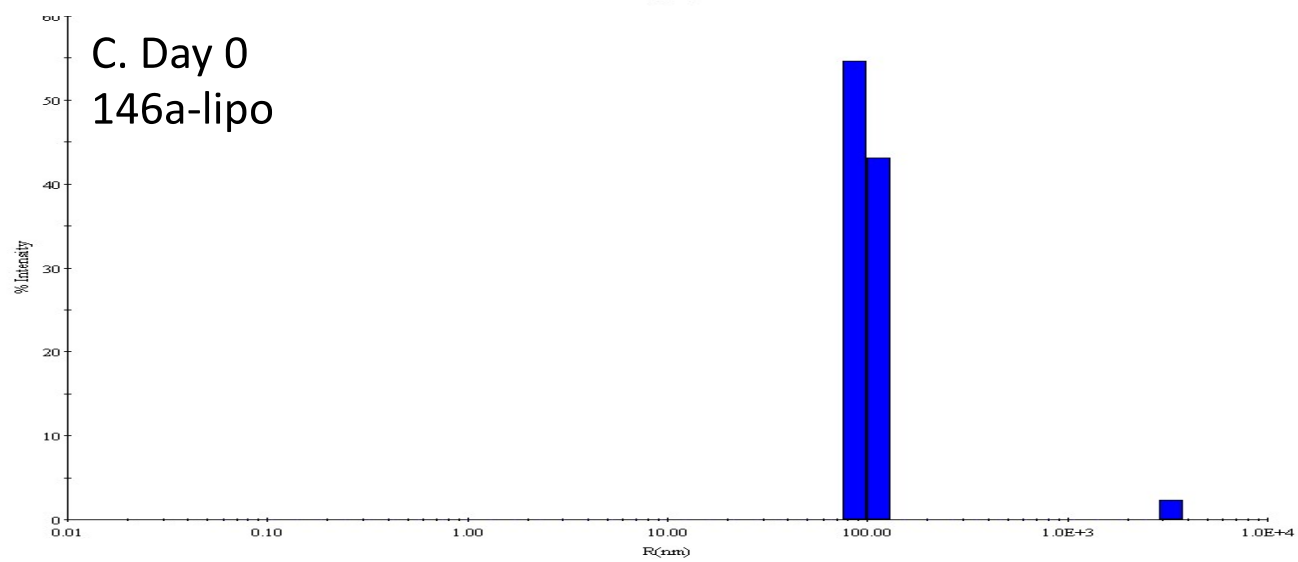

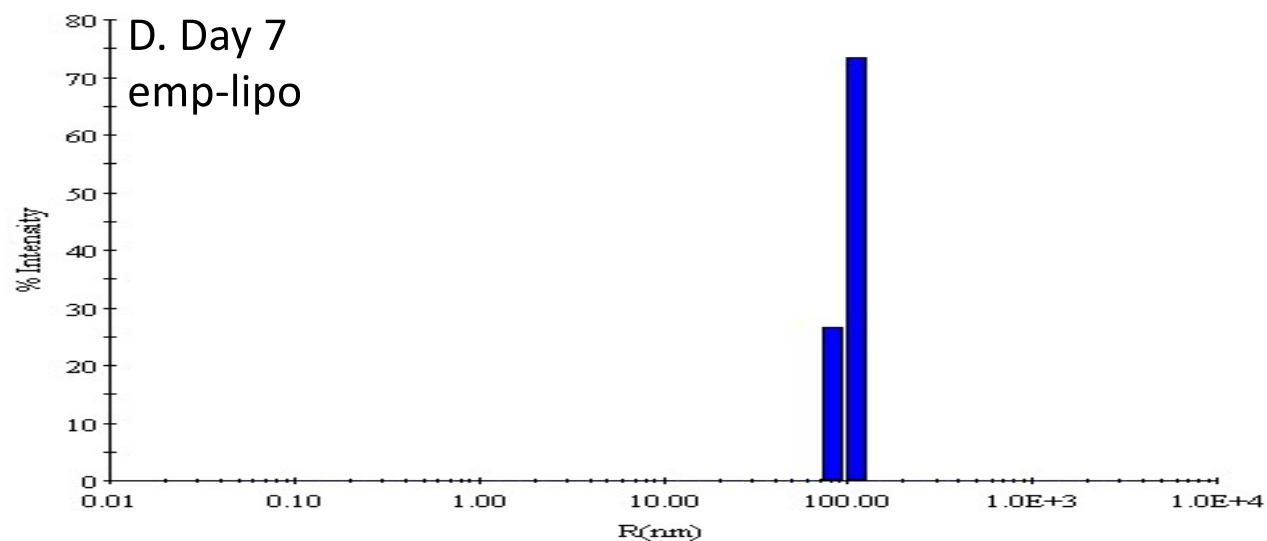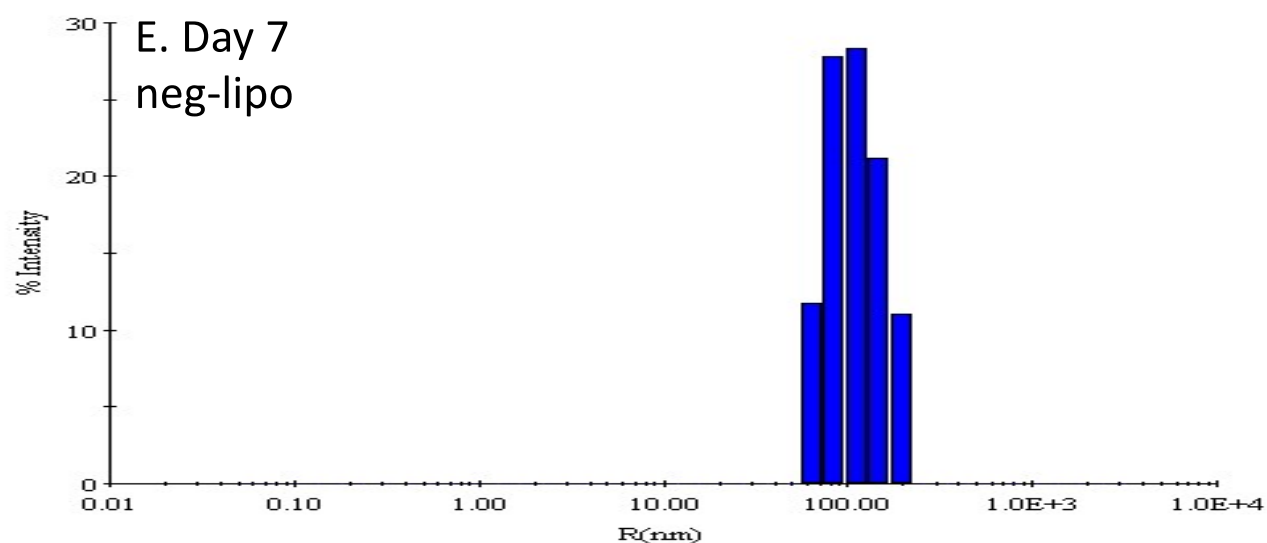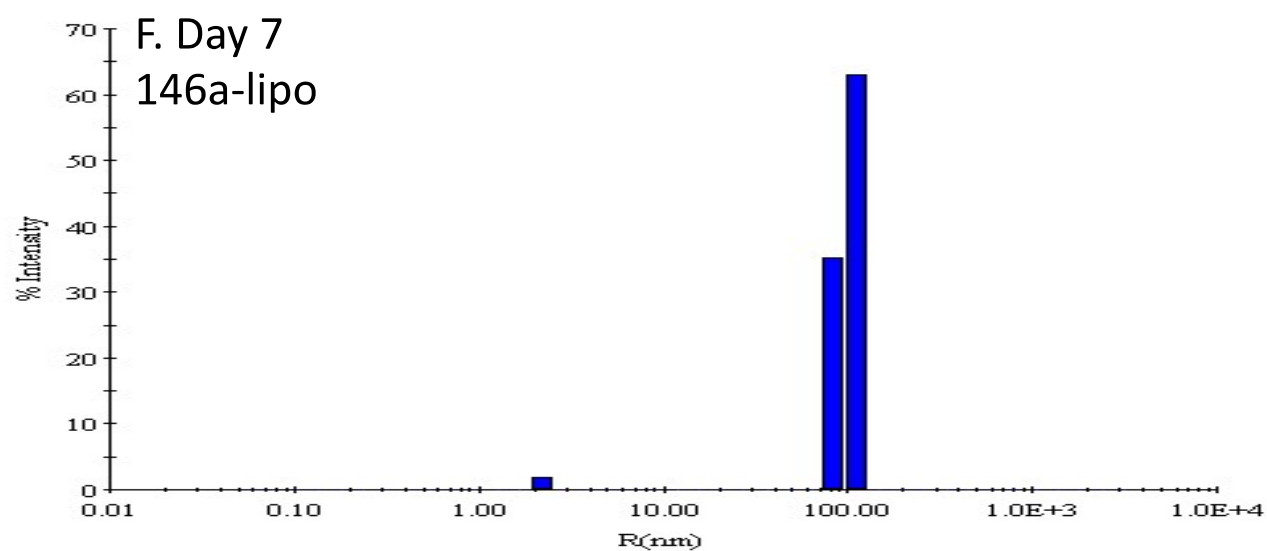

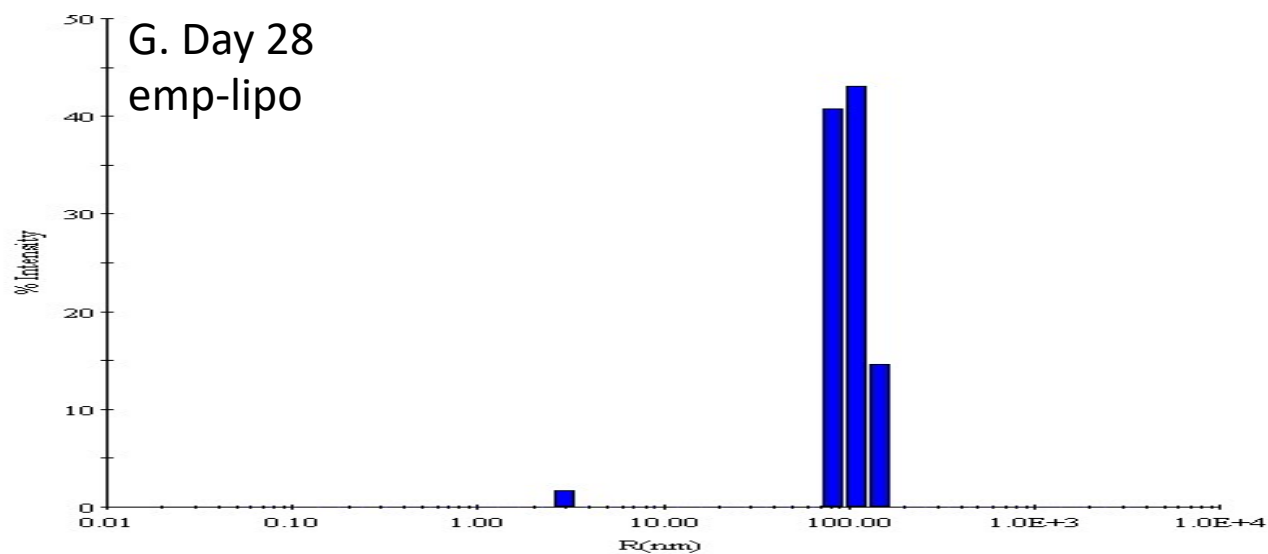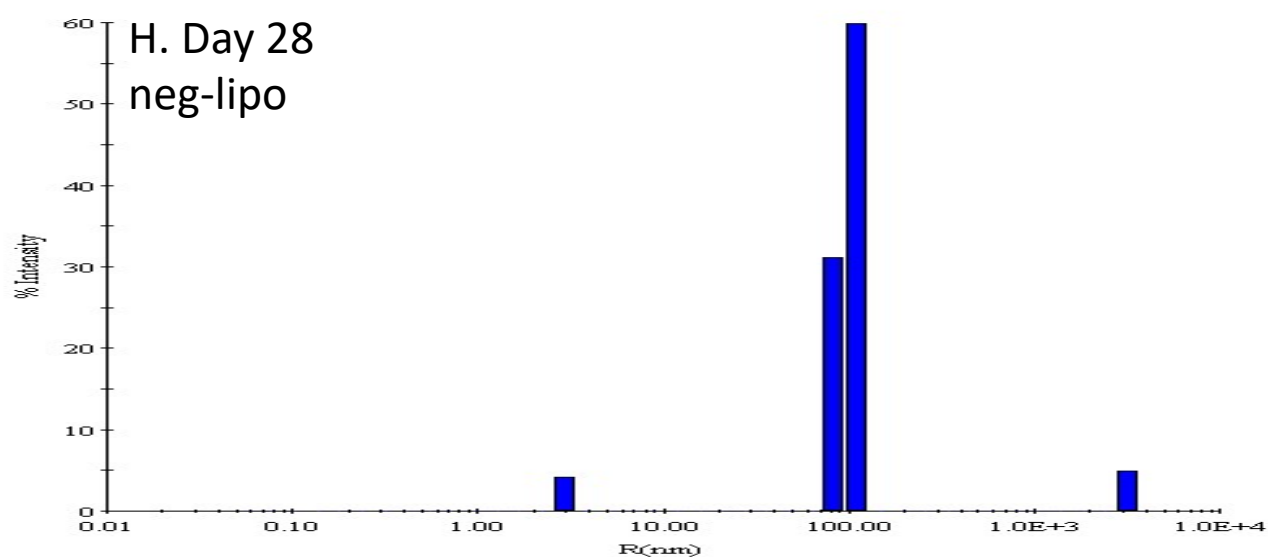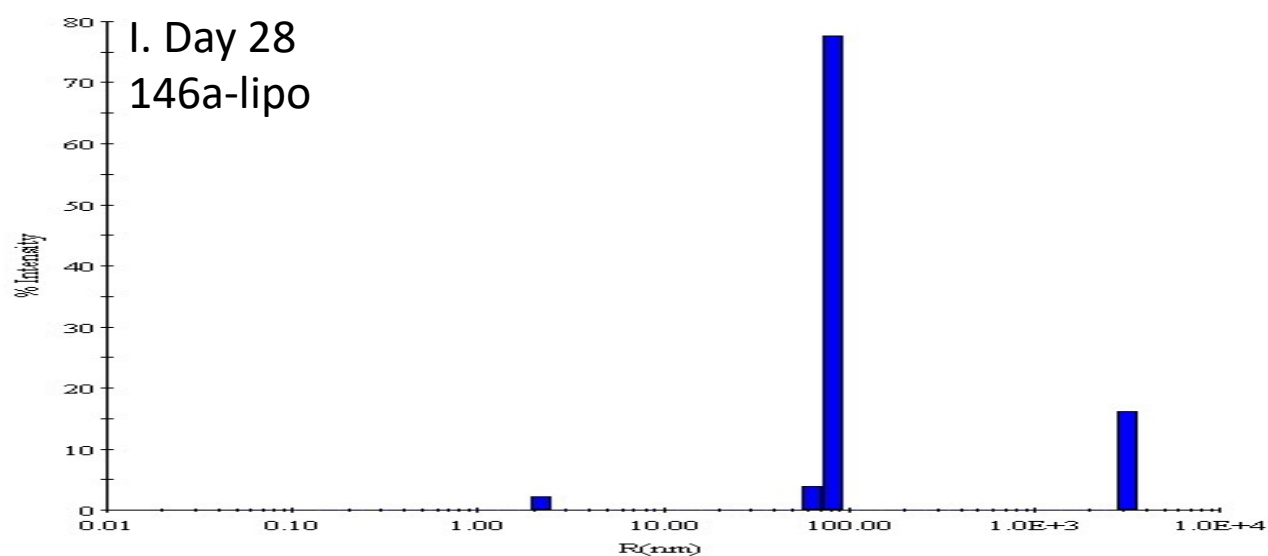

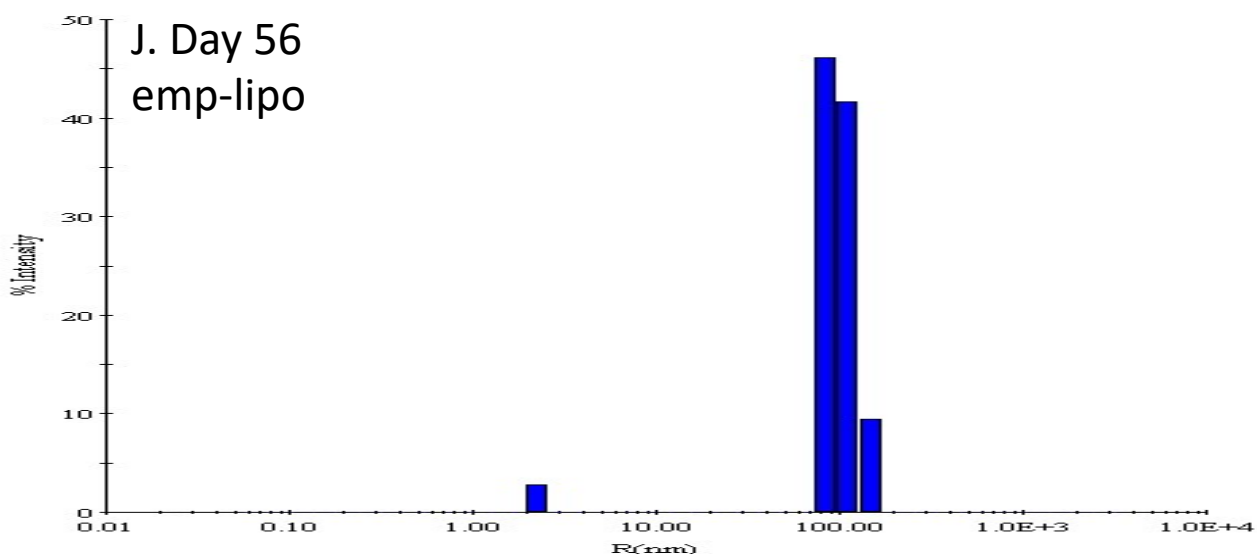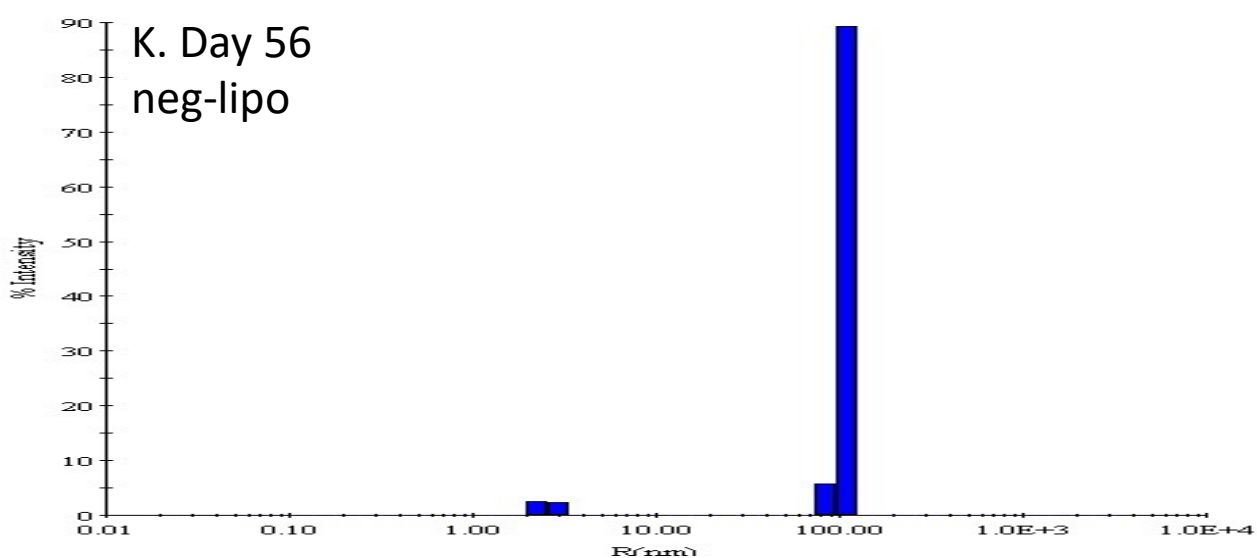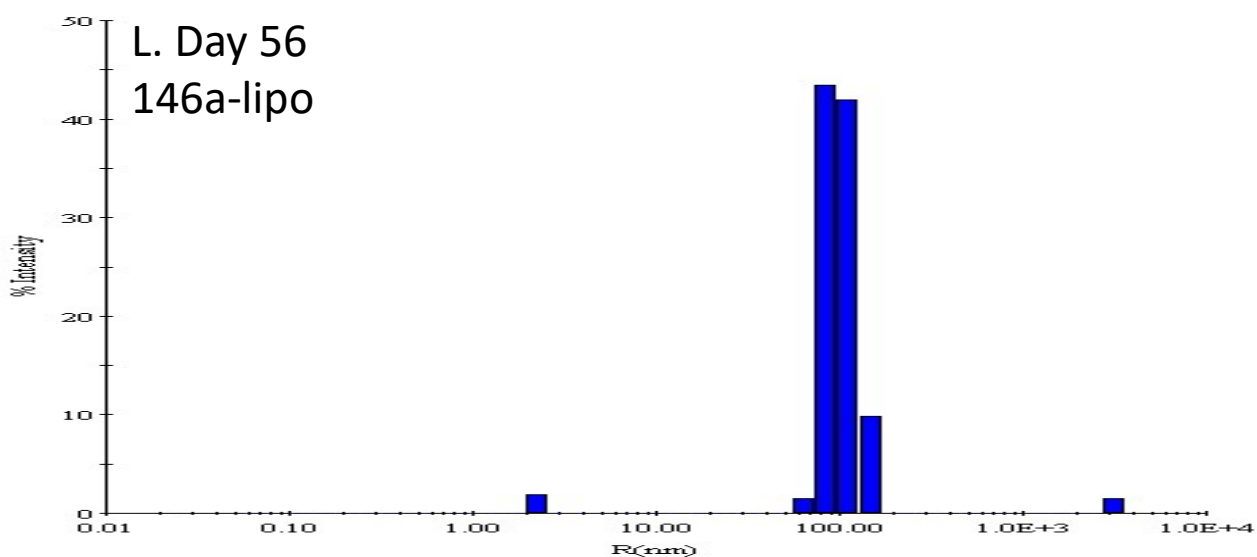

**Figure S1.2. Long term analysis of liposome size distribution.** Over the course of 56 days, the size distribution of emp-lipo, neg-lipo, and 146a-lipo was analyzed using DLS. **A.-C.)** Size distribution of respective liposomes at day 0. **D.-F.)** Size distribution of respective liposomes at day 7. **G.-I.)** Size distribution of respective liposomes at day 28. **J.-L.)** Size distribution of respective liposomes at day 56.

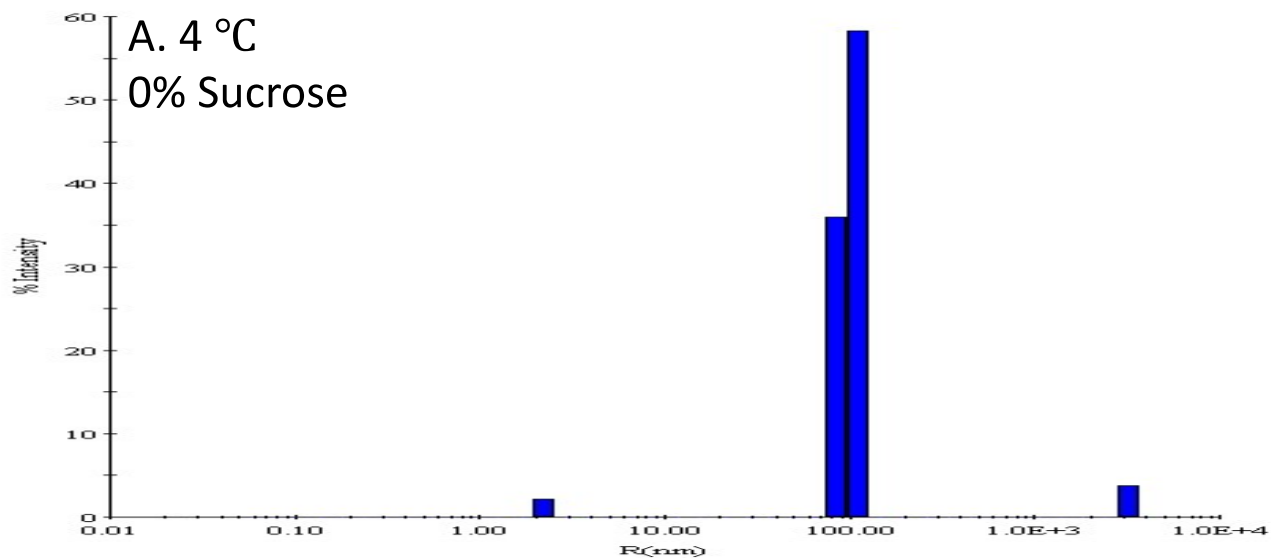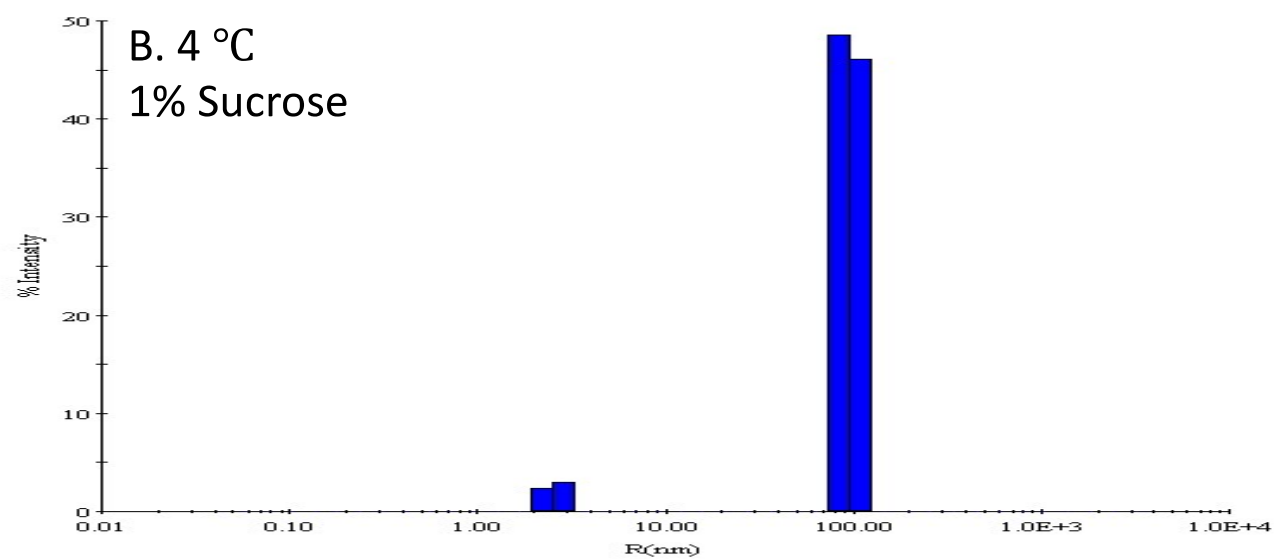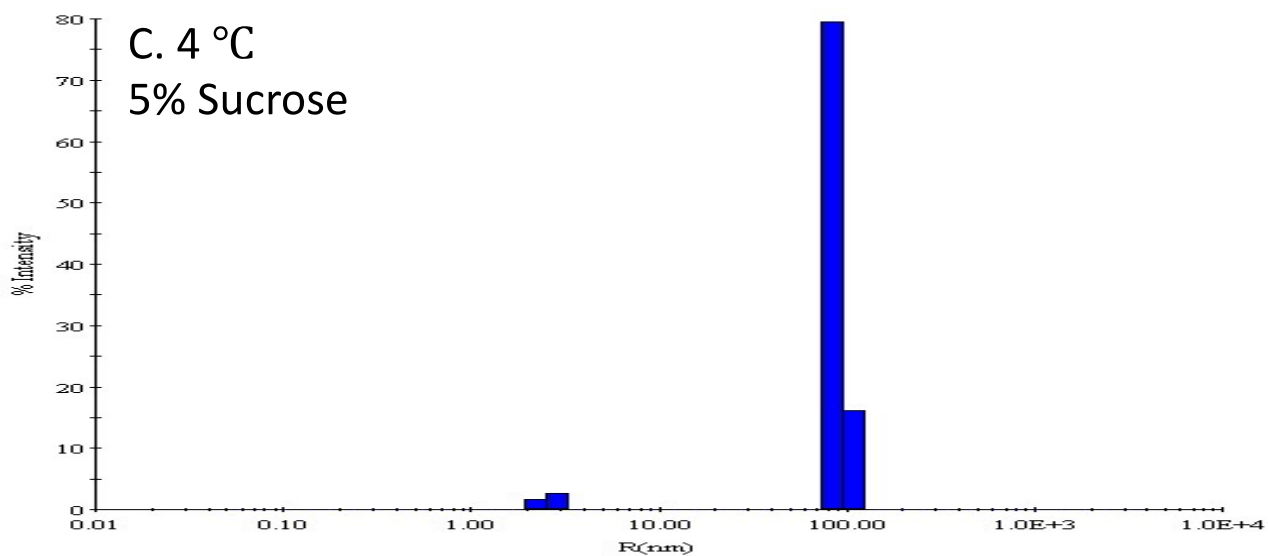

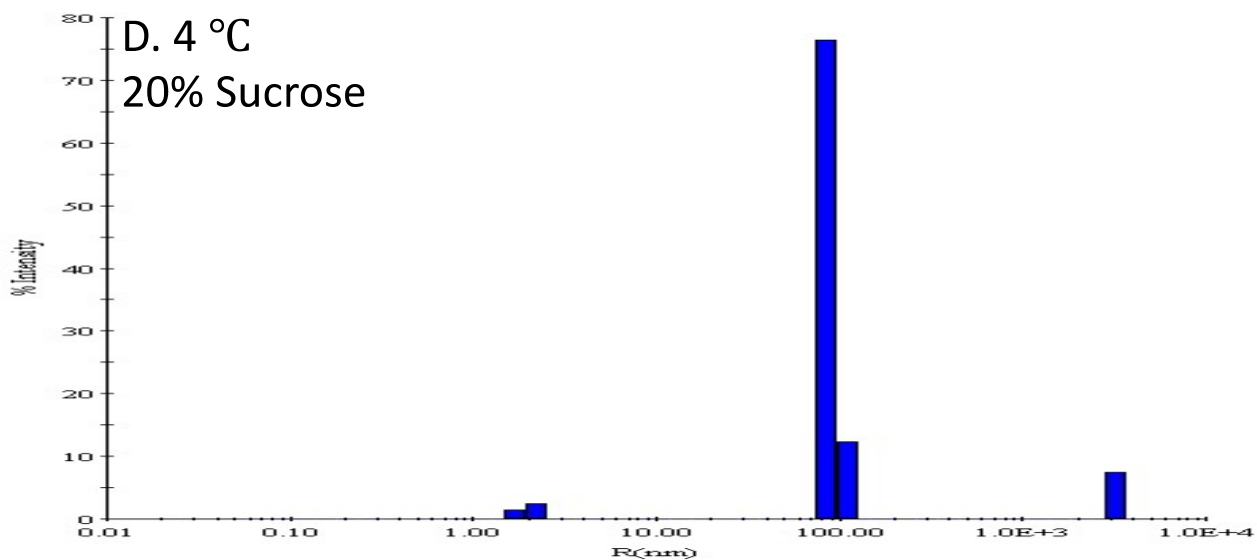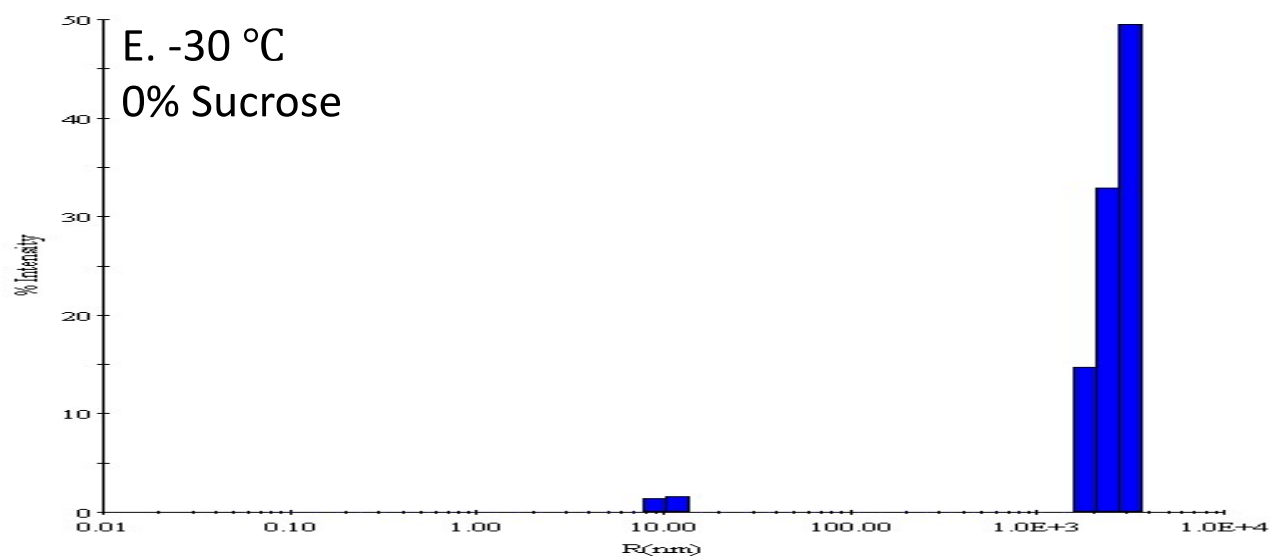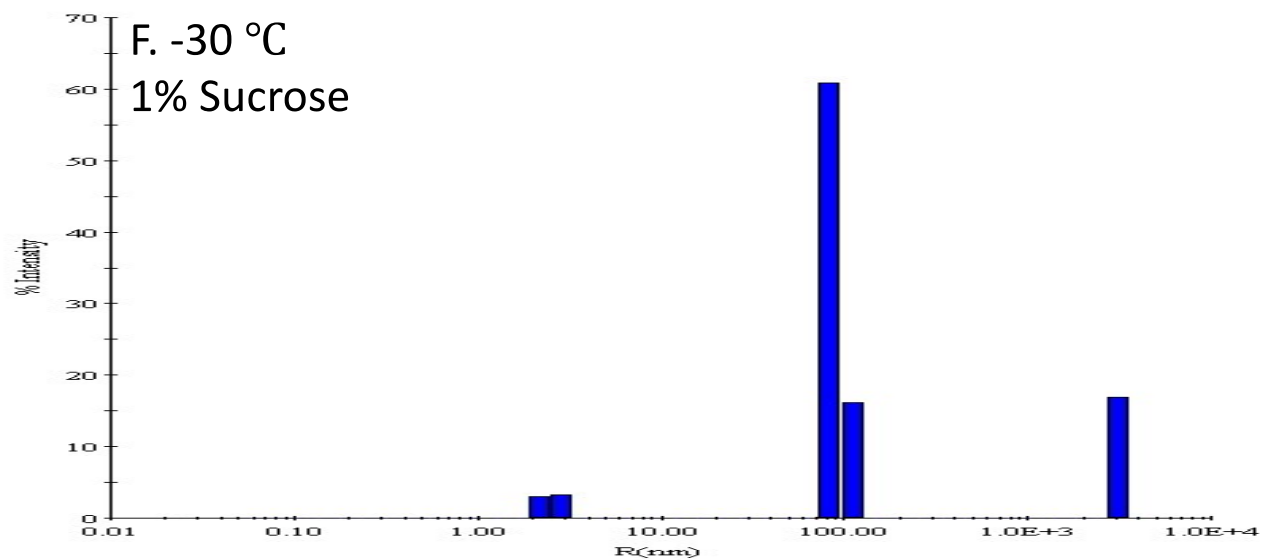

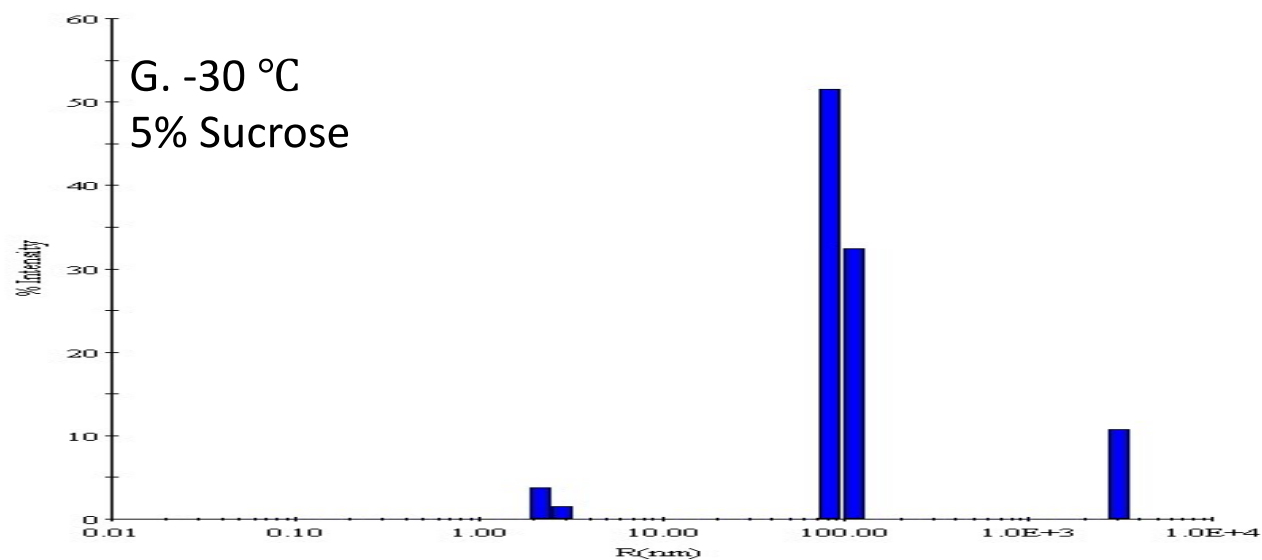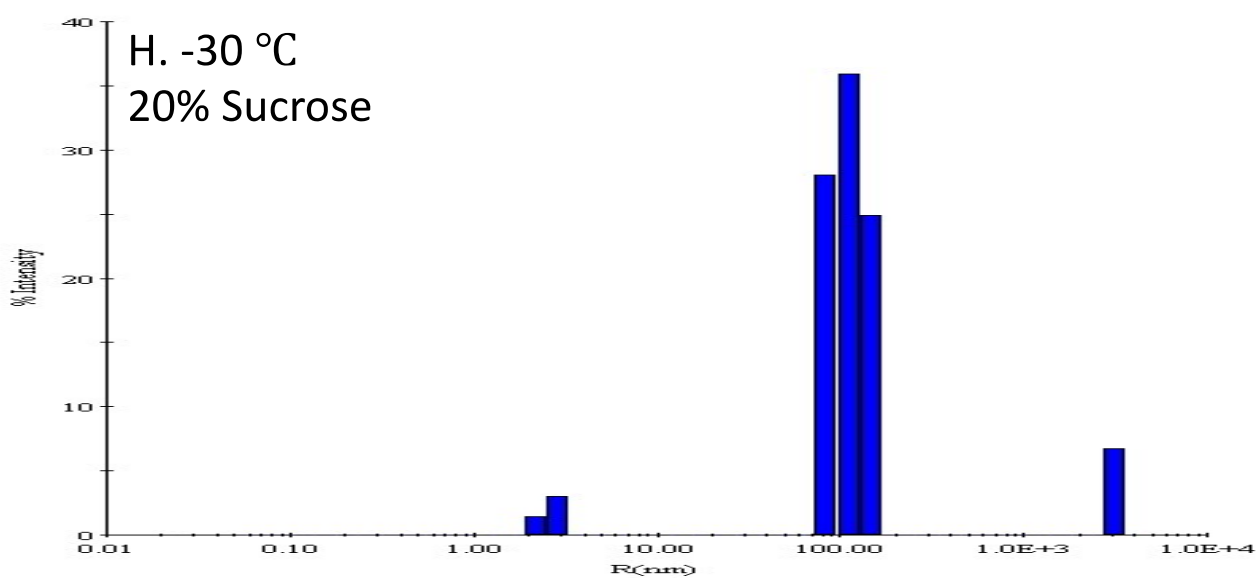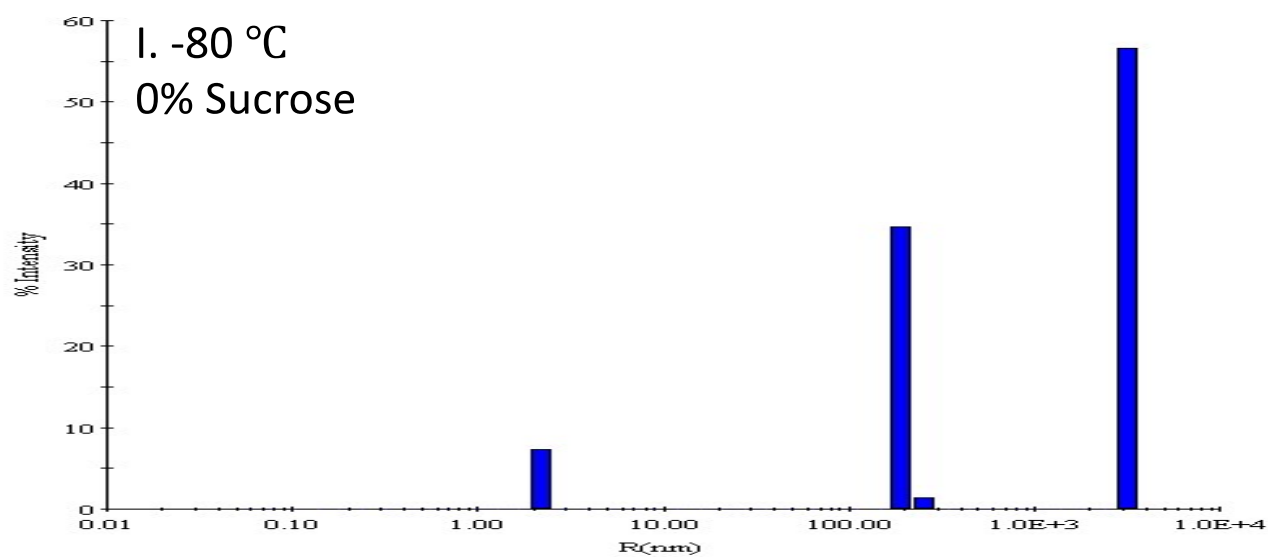

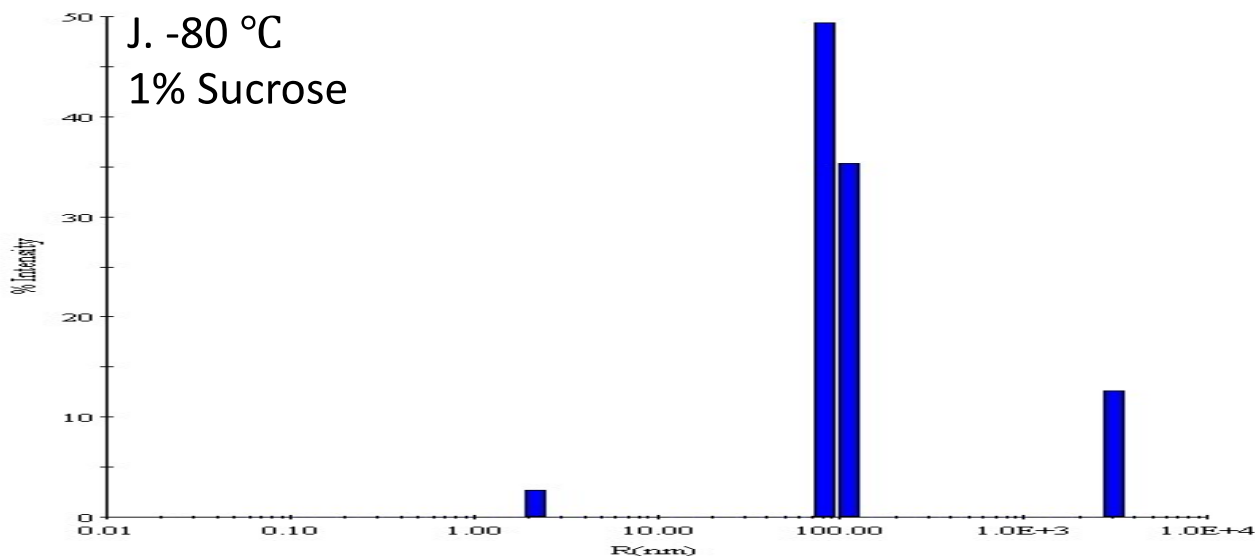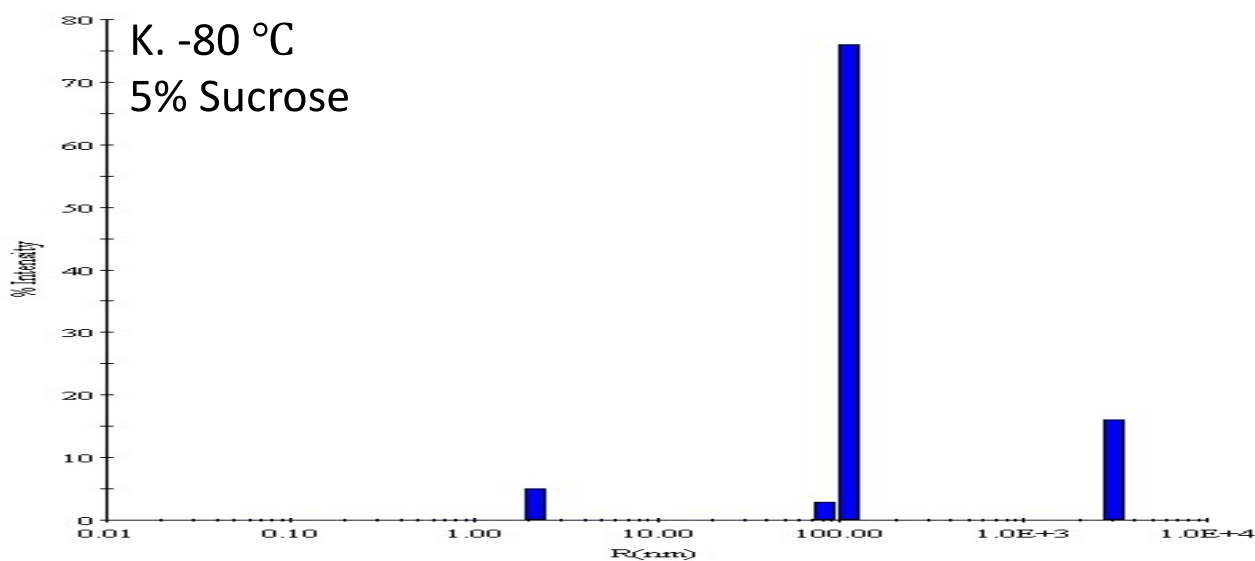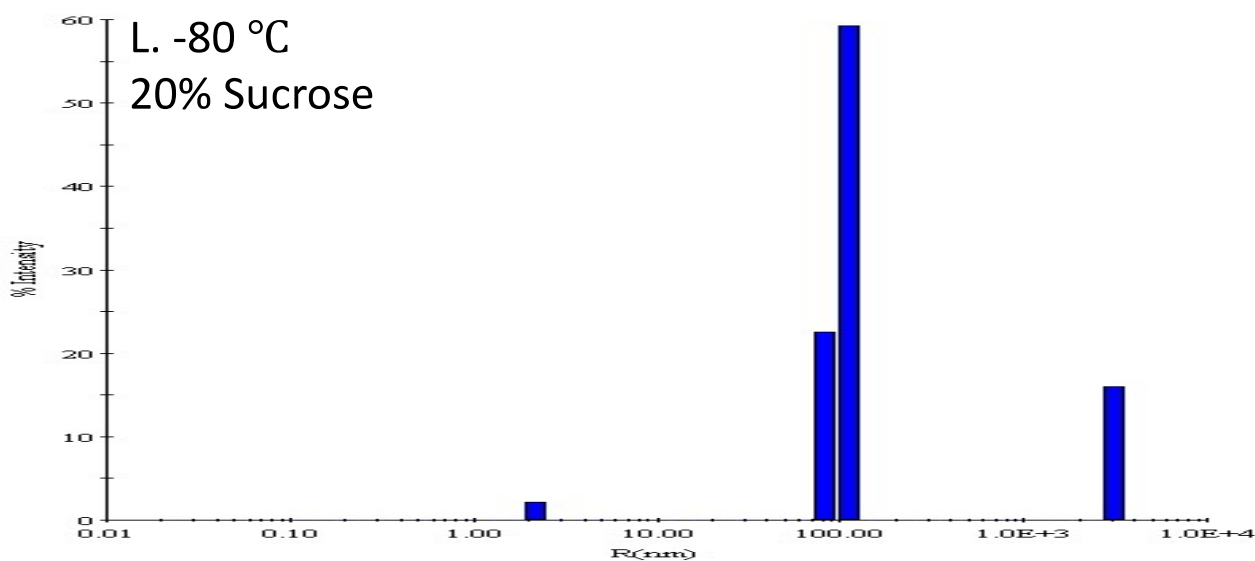

**Figure S1.3. Size distribution analysis of miR-146a encapsulated liposomes following freeze thaw. A.-D.)** Size distribution at 4 °C with 0, 1, 5, and 20% sucrose respectively. **E.-H.)** Size distribution at -30 °C with 0, 1, 5, and 20% sucrose respectively. **I.-L.)** Size distribution at -80 °C with 0, 1, 5, and 20% sucrose respectively.

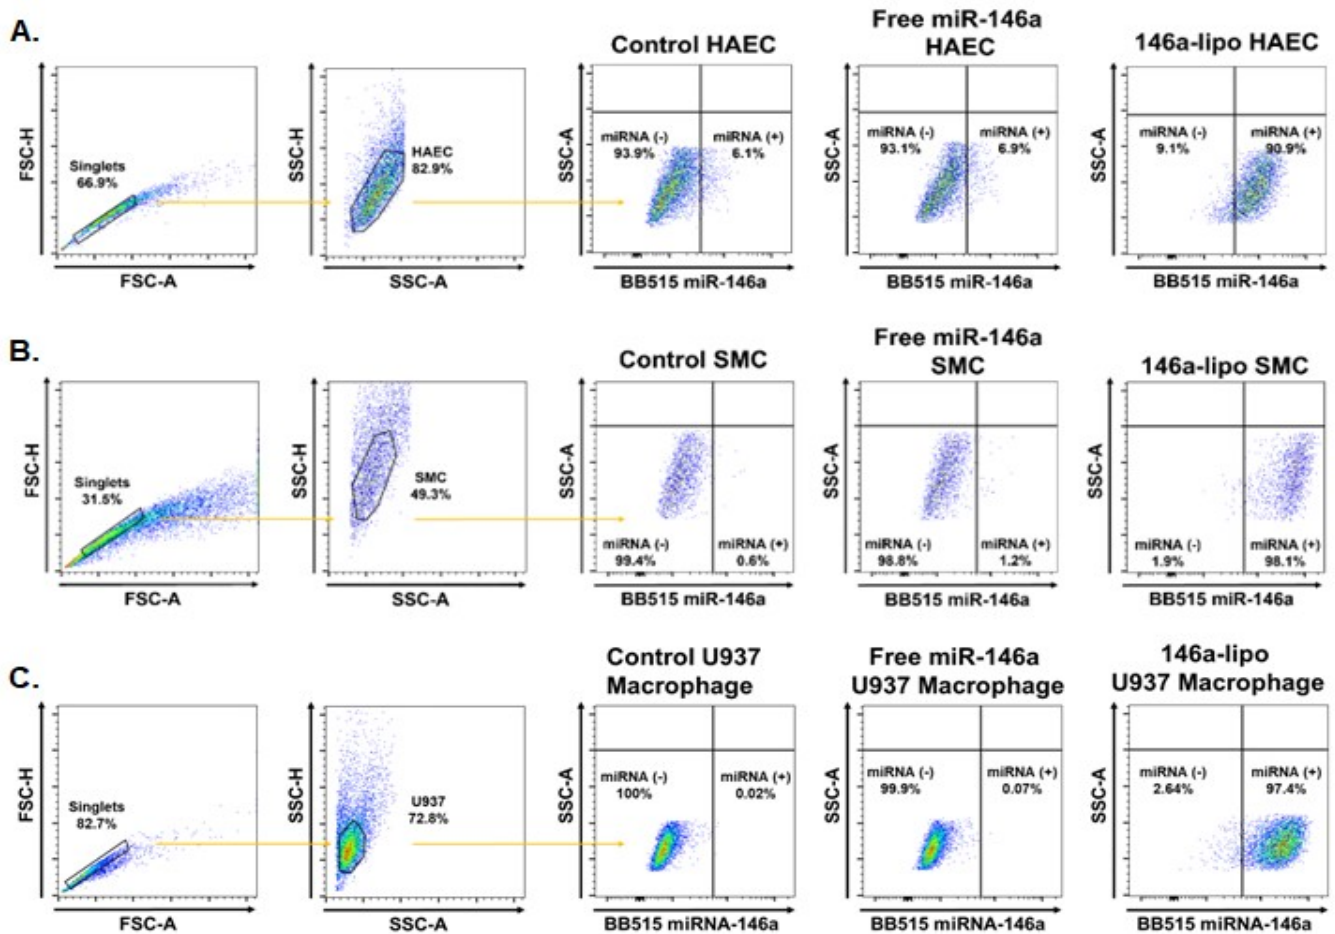

**Figure S2. Analytic gating strategy of flow cytometry for miR-146a transfected cells.** After transfection/treatment of free miR-146a and miR-146a encapsulated liposomes to **A.)** human aortic endothelial cells (HAECs), **B.)** human aortic smooth muscle cells (SMCs), and **C.)** PMA-differentiated U937 cells, and cells were detached with trypsin, washed twice with PBS, and fixed before running flow cytometry on a BD FACSsymphony. Controls/cells without treatment were used as a negative control. Data was then analyzed and gated in FlowJo 10 as shown above. The frequency of the miR-146a+ transfected cells after doublet discrimination were then evaluated and are presented in Table 2. BB515 wavelengths: 490/515nm excitation/emission.

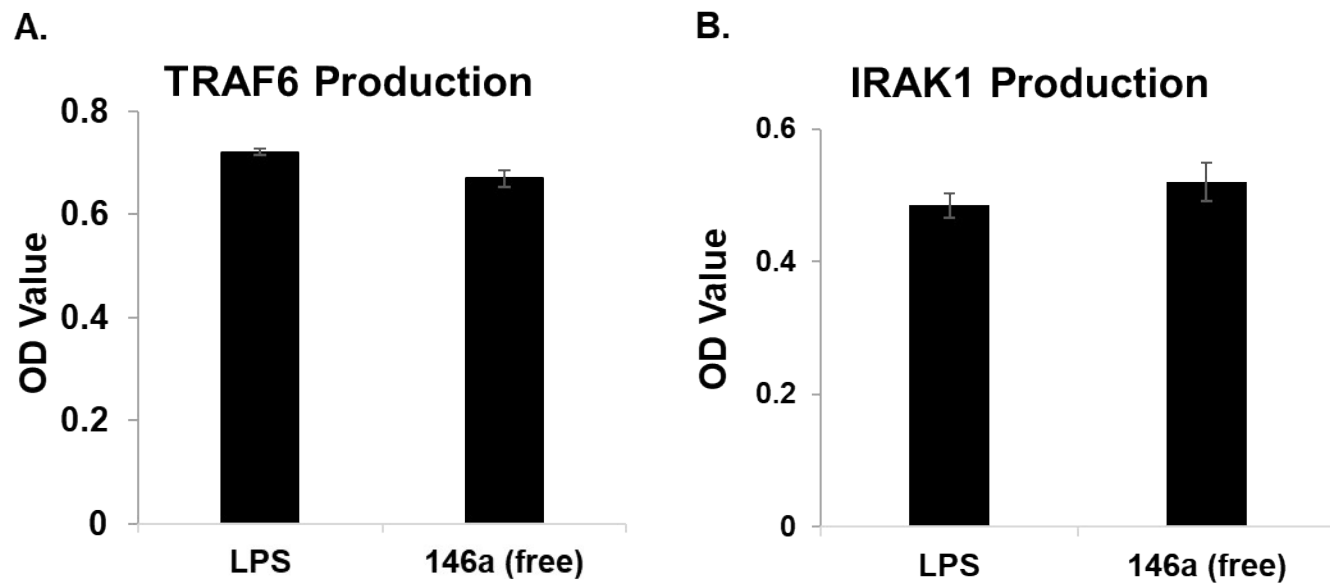

**Figure S3. Analysis of TRAF6 and IRAK1 production in LPS treated- and LPS & free miR-146a treated differentiated U937 cells.**
